# Supplementary material for: Mechanistic insight into low temperature SCR by ceria–manganese mixed oxides incorporated into zeolites
Source: Royal Society of Chemistry journal article supplement (doi:10.1039/d2cy01921c), 2023-01-01
Supplement: d2cy01921c1.pdf [file d2cy01921c1.pdf]

# Mechanistic Insight into Low Temperature SCR by Ceria-Manganese Mixed Oxide Phases Incorporated into Zeolites

## Supporting Information

Nicholas C. Nelson<sup>1</sup>, Tahrizi Andana<sup>1</sup>, Kenneth G. Rappé<sup>\*,1</sup>, Yong Wang<sup>1,2</sup>

<sup>1</sup>Energy & Environment Directorate, Pacific Northwest National Laboratory, Richland, WA 99354, USA

<sup>2</sup>The Gene and Linda Voiland School of Chemical Engineering and Bioengineering, Washington State University, Pullman, WA, USA

\*Corresponding author e-mail: ken.rappe@pnnl.gov

**Table S1.** Textural properties obtained through N<sub>2</sub> physisorption

| Sample                                                       | BET surface area (m <sup>2</sup> g <sup>-1</sup> ) |           | Pore volume (cm <sup>3</sup> g <sup>-1</sup> ) |           |
|--------------------------------------------------------------|----------------------------------------------------|-----------|------------------------------------------------|-----------|
|                                                              | Total                                              | Micropore | Total                                          | Micropore |
| H-SSZ-13                                                     | 729                                                | 667       | 0.30                                           | 0.25      |
| Ce <sub>0.7</sub> Mn <sub>0.3</sub> O <sub>x</sub> /H-SSZ-13 | 552                                                | 509       | 0.28                                           | 0.19      |
| Ce <sub>0.7</sub> Mn <sub>0.3</sub> O <sub>x</sub>           | 28                                                 | n/a       | 0.54                                           | n/a       |

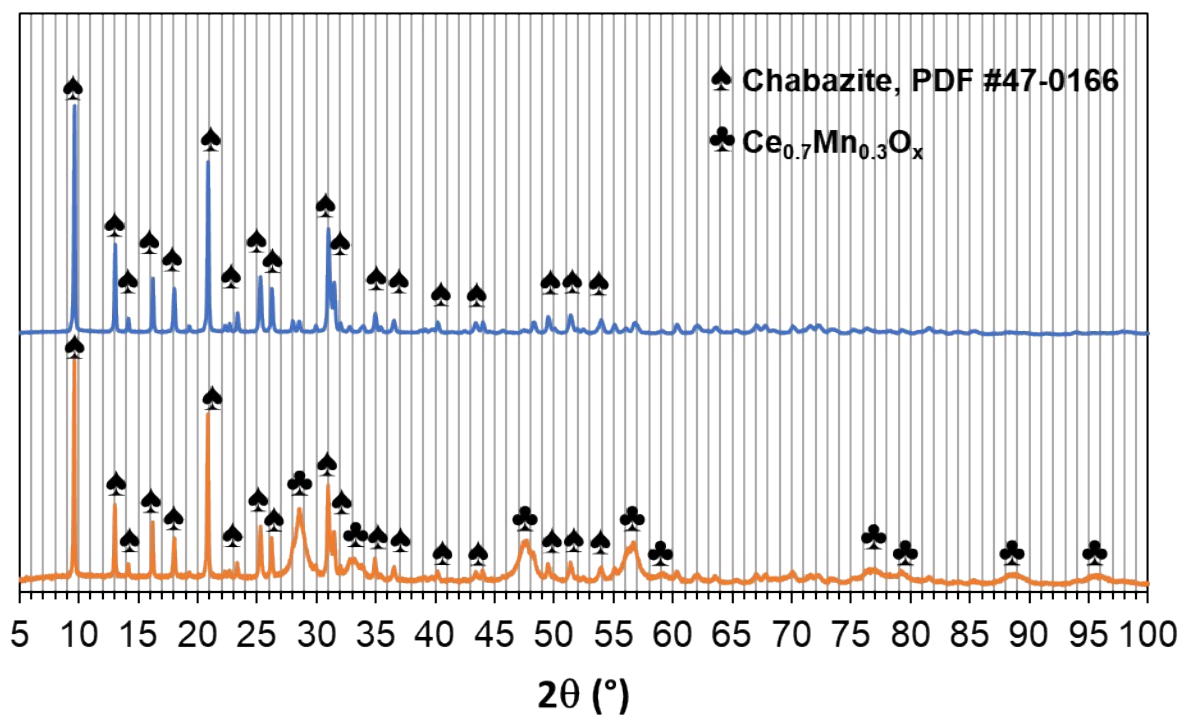

**Figure S1.** Experimental XRD pattern of H-SSZ-13 (top) and  $\text{Ce}_{0.7}\text{Mn}_{0.3}\text{O}_x/\text{H-SSZ-13}$  (bottom).

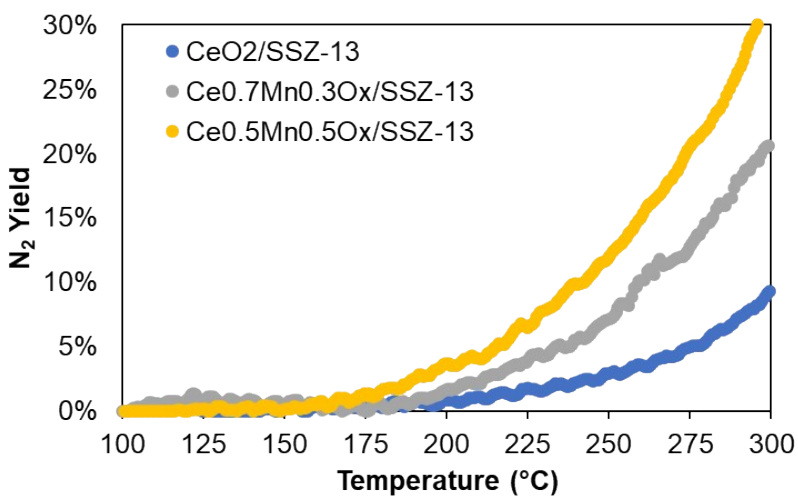

**Figure S2.**  $\text{N}_2$  yield as a function of temperature during  $\text{NH}_3$ -SCR over  $\text{Ce}_x\text{Mn}_{1-x}\text{O}_y/\text{H-SSZ-13}$  composite catalyst. Reaction conditions:  $[\text{NO}] = 325$  ppm;  $[\text{NO}_2] = 6$  ppm;  $[\text{NH}_3] = 330$  ppm;  $[\text{O}_2] = 15\%$ ;  $[\text{N}_2] = \text{balance}$ ; flow rate = 1.5 SLM; GHSV =  $1.7 \times 10^6 \text{ h}^{-1}$ .

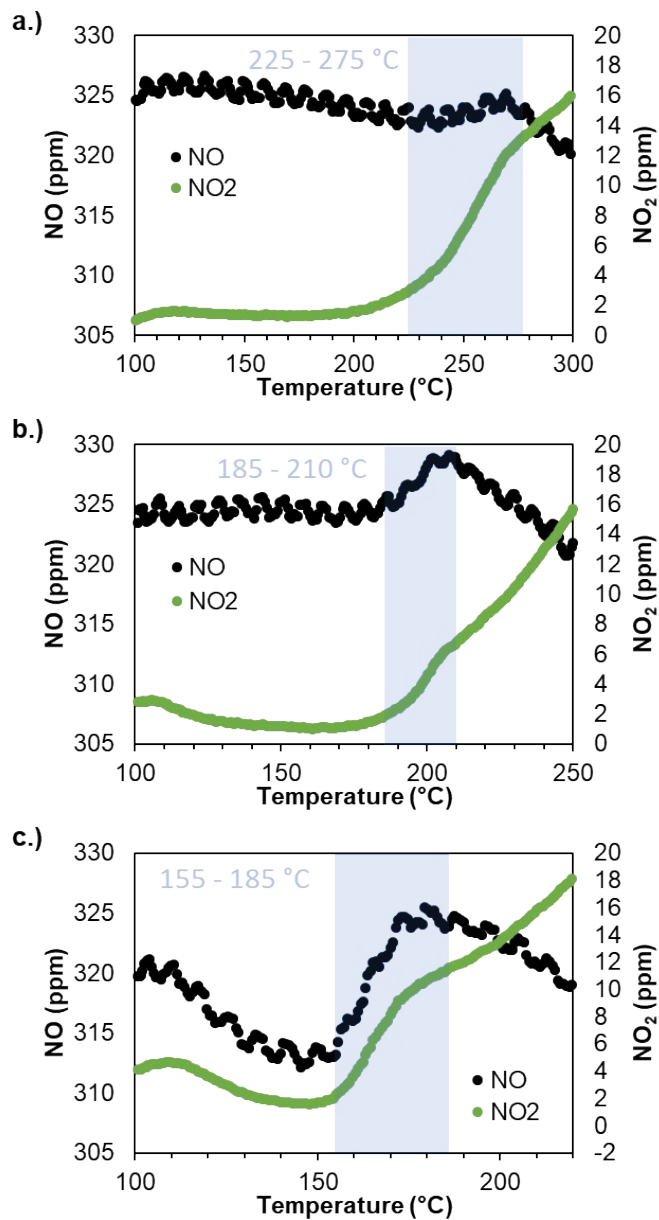

**Figure S3.** NO and NO<sub>2</sub> concentration profile at the reactor outlet over (a) CeO<sub>2</sub>/H-SSZ-13, (b) Ce<sub>0.7</sub>Mn<sub>0.3</sub>O<sub>y</sub>/H-SSZ-13, (c) Ce<sub>0.5</sub>Mn<sub>0.5</sub>O<sub>y</sub>/H-SSZ-13 during NO oxidation with pre-adsorbed NH<sub>3</sub>. Reaction conditions: [NO] = 325 ppm; [NO<sub>2</sub>] = 6 ppm; [O<sub>2</sub>] = 15 %; [N<sub>2</sub>] = balance; F = 1.5 SLM; GHSV = 1.7e+6 h<sup>-1</sup>.

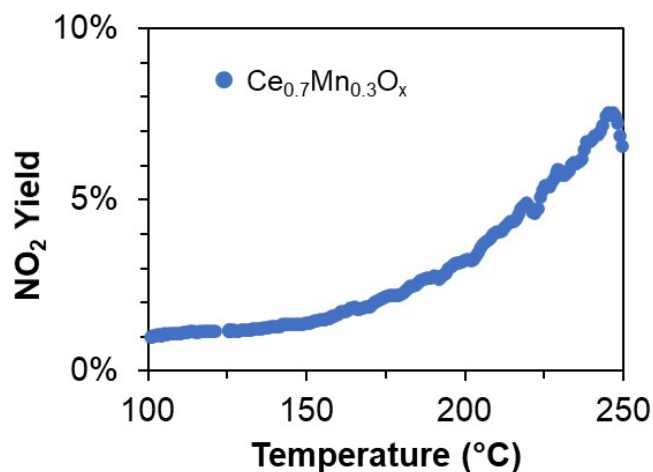

**Figure S4.** NO oxidation activity over bulk  $\text{Ce}_{0.7}\text{Mn}_{0.3}\text{O}_x$  with pre-adsorbed  $\text{NH}_3$ . No curvature change is observed, unlike the mixed oxide supported on zeolite. Reaction conditions:  $[\text{NO}] = 325 \text{ ppm}$ ;  $[\text{NO}_2] = 6 \text{ ppm}$ ;  $[\text{O}_2] = 15 \%$ ;  $[\text{N}_2] = \text{balance}$ ;  $F = 1.5 \text{ SLM}$ ;  $\text{GHSV} = 4.6 \times 10^6 \text{ h}^{-1}$ .

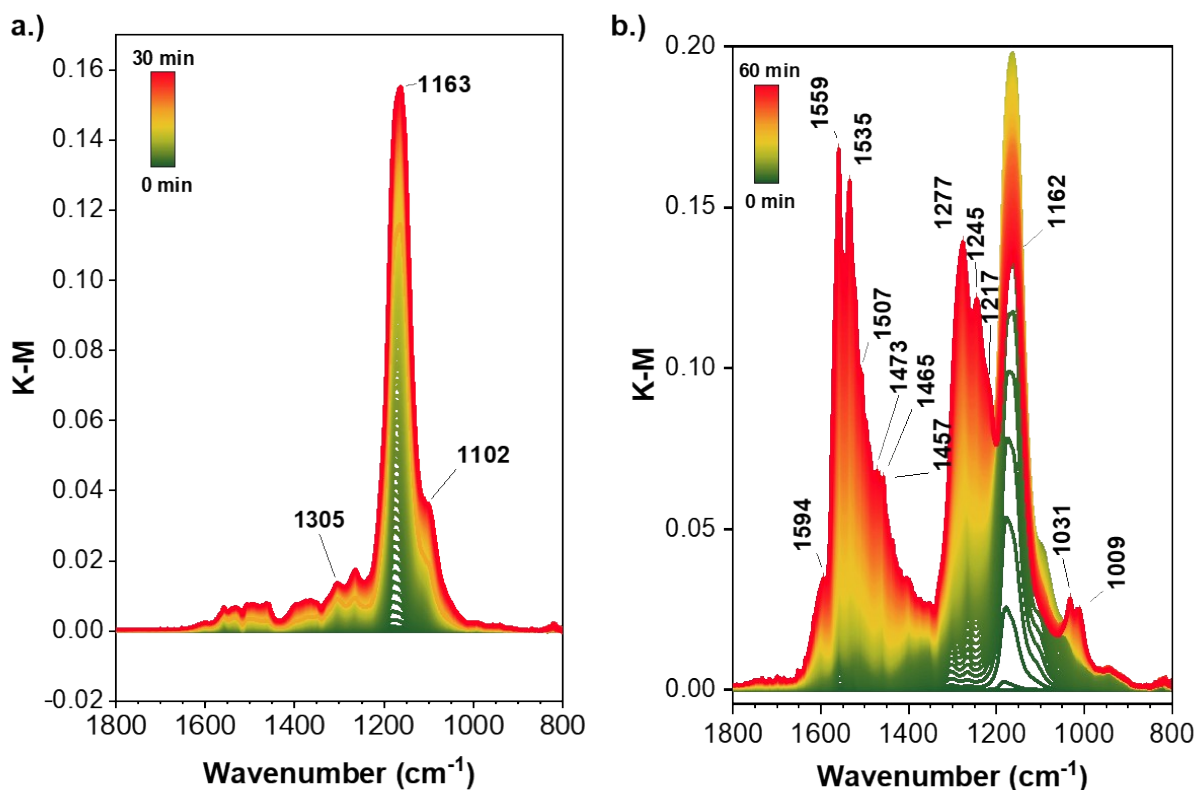

**Figure S5.** DRIFTS recorded during exposure of  $\text{Ce}_{0.7}\text{Mn}_{0.3}\text{O}_x$  bulk oxide to a.) NO and b.) NO +  $\text{O}_2$  at 150 °C. The catalyst was pre-treated with 2%  $\text{O}_2$  at 500 °C for 15 min, followed by He purge for 45 min at 500 °C prior to each measurement. Conditions:  $[\text{NO}] = 350 \text{ ppm}$ ;  $[\text{O}_2] = 2\%$ ;  $F = 100 \text{ mL min}^{-1}$ . For (a), the bands

at 1163  $\text{cm}^{-1}$  and 1305  $\text{cm}^{-1}$  were attributed to symmetric nitrites. The band at 1102  $\text{cm}^{-1}$  was attributed to hyponitrites.<sup>1</sup>

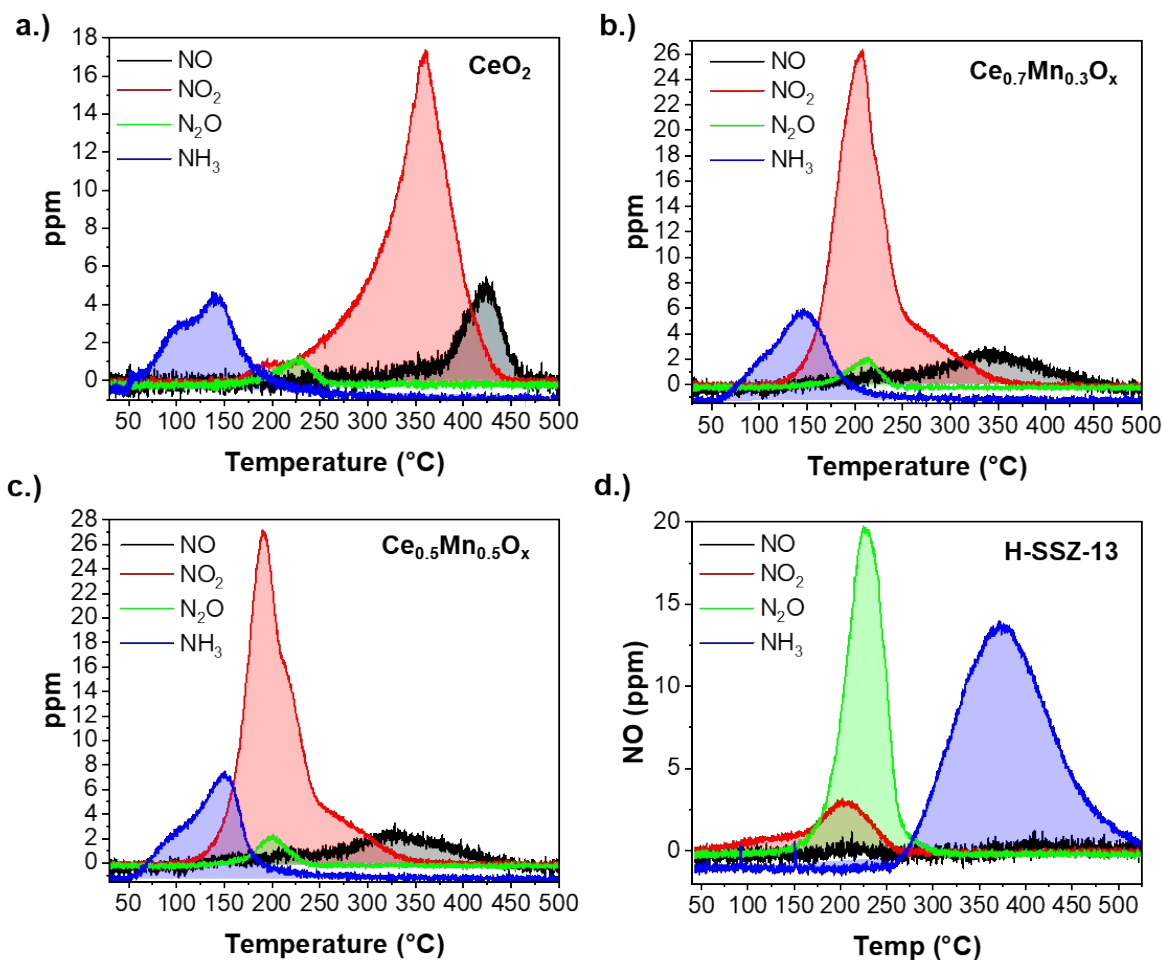

**Figure S6.** Ammonium nitrate decomposition products observed during heating in N<sub>2</sub> over bulk oxide catalysts. The shaded areas represent the integrated areas used in Figure 3a. The NO evolved in (a-c) is a thermodynamic effect derived from NO<sub>2</sub> dissociation to NO and O<sub>2</sub>. For (a), the temperature that NO<sub>2</sub> evolved likely reflects the ability of the ceria surface to store NO<sub>x</sub> as opposed to the temperature at which ammonium nitrate decomposes.<sup>2</sup> From panel (a) we assume that in the absence of NO<sub>x</sub> storage, the NO<sub>2</sub> desorption leading edge would have been around 175 °C, about 40-50 °C higher than for the Mn-based catalysts. Conditions: [NH<sub>4</sub>NO<sub>3</sub>] = 15 wt. %;  $\beta$  = 10 °C min<sup>-1</sup>; F = 1 SLM.

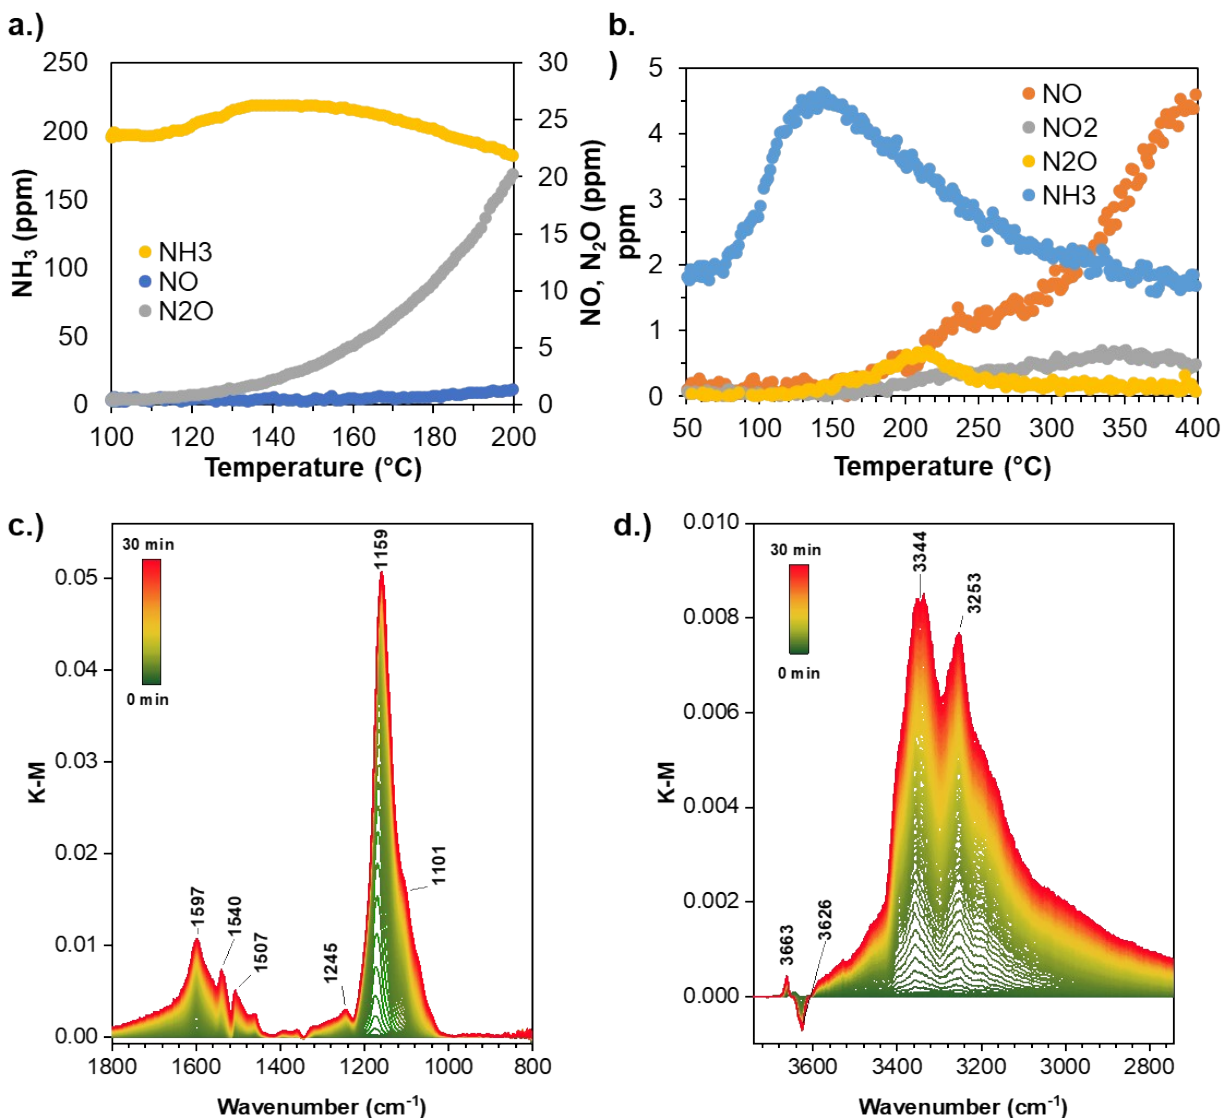

**Figure S7.** a.) Light-off profile obtained by flowing  $\text{NH}_3$  over bulk  $\text{Ce}_{0.7}\text{Mn}_{0.3}\text{O}_y$ . Conditions:  $[\text{NH}_3] = 200$  ppm;  $[\text{N}_2] = \text{balance}$ ;  $\beta = 5$  °C  $\text{min}^{-1}$ ;  $F = 1$  SLM. b.)  $\text{NH}_3$  temperature programmed desorption (TPD) over bulk  $\text{Ce}_{0.7}\text{Mn}_{0.3}\text{O}_y$ . The catalyst was heated to 500 °C in 15 %  $\text{O}_2$  for 0.5 h, followed by cooling under He, admittance of 350 ppm  $\text{NH}_3$  for 0.5 h at 50 °C, and heating at 10 °C  $\text{min}^{-1}$  under 1 SLM  $\text{N}_2$ . c.) DRIFTS recorded during exposure of bulk  $\text{Ce}_{0.7}\text{Mn}_{0.3}\text{O}_x$  to  $\text{NH}_3$  at 150 °C in the 1800-800  $\text{cm}^{-1}$  region. The bands at 1159  $\text{cm}^{-1}$  and 1597  $\text{cm}^{-1}$  were attributed, in part, to  $\text{NH}_3$  adsorbed at Lewis acid.<sup>3</sup> The other labelled bands were attributed to  $\text{NO}_x$  species. The shoulder at 1101  $\text{cm}^{-1}$  suggests the presence of hyponitrite.<sup>1</sup> d.) DRIFTS recorded during exposure of bulk  $\text{Ce}_{0.7}\text{Mn}_{0.3}\text{O}_x$  to  $\text{NH}_3$  at 150 °C in the 3730-2750  $\text{cm}^{-1}$  region. The bands spanning 3350-3250  $\text{cm}^{-1}$  are attributed to adsorbed  $\text{NH}_3$ .

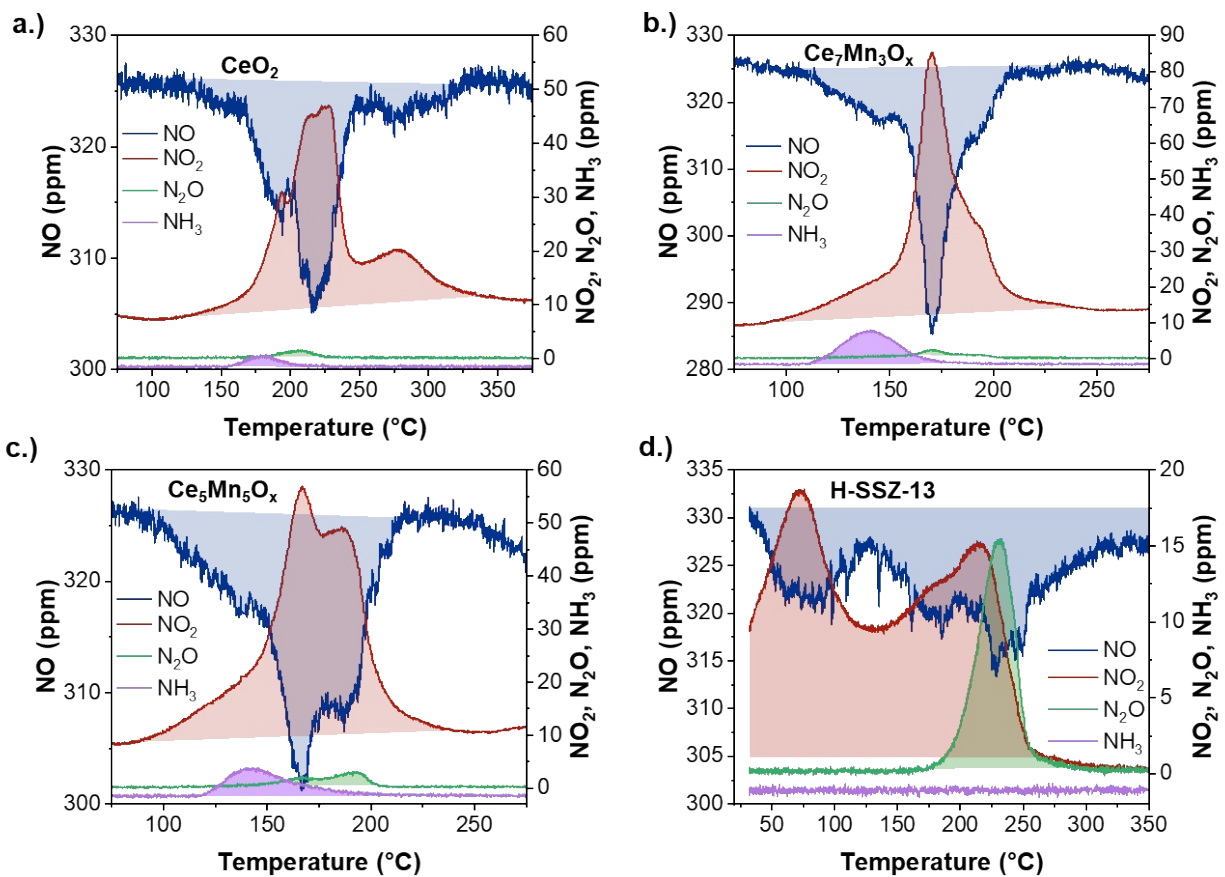

**Figure S8.** Temperature programmed surface reaction between NO and NH<sub>4</sub>NO<sub>3</sub> over bulk oxide catalysts. The shaded areas represent the integrated areas used in Figure 3b. Conditions: [NH<sub>4</sub>NO<sub>3</sub>] = 15 wt. %; [NO] = 325 ppm;  $\beta$  = 10 °C min<sup>-1</sup>; F = 1 SLM.

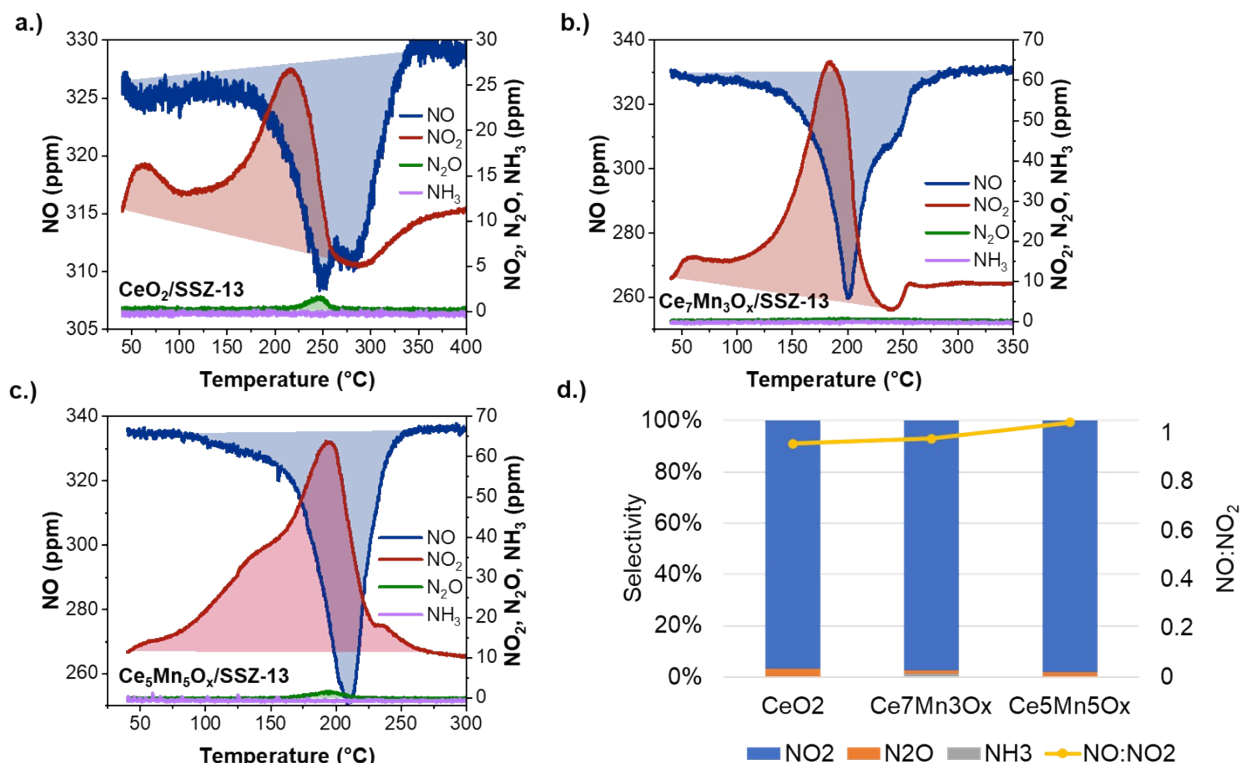

**Figure S9.** Temperature programmed surface reaction between NO and NH<sub>4</sub>NO<sub>3</sub> over zeolite-supported mixed oxide catalysts. The shaded areas represent the integrated areas used in for the histogram in (d). Conditions: [NH<sub>4</sub>NO<sub>3</sub>] = 15 wt. %; [NO] = 325 ppm;  $\beta$  = 10 °C min<sup>-1</sup>; F = 1 SLM.

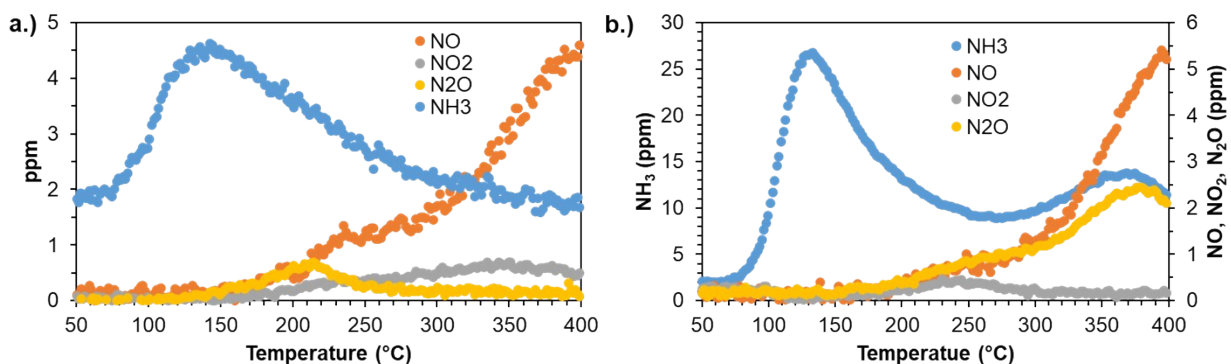

**Figure S10.** NH<sub>3</sub> temperature programmed desorption (TPD) over a.) bulk Ce<sub>0.7</sub>Mn<sub>0.3</sub>O<sub>y</sub> and b.) Ce<sub>0.7</sub>Mn<sub>0.3</sub>O<sub>y</sub>/SSZ-13. Both catalysts were heated to 500 °C in 15 % O<sub>2</sub> for 0.5 h, followed by cooling under He, admittance of 350 ppm NH<sub>3</sub> for 0.5 h at 50 °C, and heating at 10 °C min<sup>-1</sup> under 1 SLM N<sub>2</sub>.

## References:

1. Mihaylov, M. Y.; Ivanova, E. Z.; Vayssilov, G. N.; Hadjiivanov, K. I., Revisiting ceria-NO<sub>x</sub> interaction: FTIR studies. *Catal. Today* **2020**, 357, 613-620.
2. Kim, Y.; Hwang, S.; Lee, J.; Ryou, Y.; Lee, H.; Kim, C. H.; Kim, D. H., Comparison of NO<sub>x</sub> Adsorption/Desorption Behaviors over Pd/CeO<sub>2</sub> and Pd/SSZ-13 as Passive NO<sub>x</sub> Adsorbers for Cold Start Application. *Emission Contr. Sci. Technol.* **2019**, 5, 172-182.
3. Zhang, L.; Pierce, J.; Leung, V. L.; Wang, D.; Epling, W. S., Characterization of Ceria's Interaction with NO<sub>x</sub> and NH<sub>3</sub>. *J. Phys. Chem. C* **2013**, 117, 8282-8289.
